# Supplementary material
Source: HighWire-hosted journal article supplement (https://bmjopen.bmj.com/content/13/3/e069832)
Supplement: inline-supplementary-material-4 [file inline-supplementary-material-4.pdf]

Methods for assessing guideline adherence for invasive procedures in the care of chronic coronary artery disease – a scoping review:  
Supplementary Material

Supplementary file 4: Methods and results

| Study                   | Guideline and treatment decision                  | Data source and collection                                                  | Data and variables                     | Definition of guideline adherence                       | Quantification and level of measurement       | Extent of guideline adherence               |
|-------------------------|---------------------------------------------------|-----------------------------------------------------------------------------|----------------------------------------|---------------------------------------------------------|-----------------------------------------------|---------------------------------------------|
| Kiselev et al. 2019 [1] | ESC/EACTS 2014 GL on myocardial revascularization | Russian registry                                                            | - Coronary anatomy                     | a) Adherence = revascularization if indication          | Proportion of adherent/non-adherent treatment | a) Procedure performed: 81% adherence       |
|                         |                                                   | Retrospective data entry from patient charts by trained study personnel     | - Extent of stenosis                   | b) Non-adherence = indication without revascularization | A binary measure                              | b) Procedure indicated: 40% adherence       |
|                         | Revascularization                                 |                                                                             | - LVEF                                 | Indication = class I recommendation                     |                                               |                                             |
| Epstein et al. 2003 [2] | ACC/AHA 1988 GL on PTCA                           | Medicare data + patient charts                                              | - Clinical history                     | a) Non-adherence = no revascularization if indication   | Proportion of non-adherent treatment          | a) Procedure indicated: ≈ 76% adherence     |
|                         | ACC/AHA 1991GL on CABG                            | Review of coronary angiography report and charts by trained study personnel | - Symptom status                       | Indication = recommendation class I                     | A binary measure                              | b) Procedure not indicated: ≈ 94% adherence |
|                         | Revascularization                                 |                                                                             | - Therapy                              | b) Non-adherence = revascularization if no indication   |                                               |                                             |
|                         |                                                   |                                                                             | - Extent of coronary artery occlusion  | No indication = class III recommendation                |                                               |                                             |
|                         |                                                   |                                                                             | - Indication for angiography           |                                                         |                                               |                                             |
|                         |                                                   |                                                                             | - Severity of angina                   |                                                         |                                               |                                             |
|                         |                                                   |                                                                             | - Comorbid conditions and risk factors |                                                         |                                               |                                             |
|                         |                                                   |                                                                             | - Medical/surgical history             |                                                         |                                               |                                             |
|                         |                                                   |                                                                             | - Medication                           |                                                         |                                               |                                             |
|                         |                                                   |                                                                             | - Allergies/intolerances               |                                                         |                                               |                                             |
|                         |                                                   |                                                                             | - Results of stress tests              |                                                         |                                               |                                             |

| Study                    | Guideline and treatment decision            | Data source and collection                                                                                             | Data and variables                                                                                                                                                                                                                                                 | Definition of guideline adherence                                                                                                                                                                                                     | Quantification and level of measurement                                                                                                                 | Extent of guideline adherence                                                                                         |
|--------------------------|---------------------------------------------|------------------------------------------------------------------------------------------------------------------------|--------------------------------------------------------------------------------------------------------------------------------------------------------------------------------------------------------------------------------------------------------------------|---------------------------------------------------------------------------------------------------------------------------------------------------------------------------------------------------------------------------------------|---------------------------------------------------------------------------------------------------------------------------------------------------------|-----------------------------------------------------------------------------------------------------------------------|
| O'Connor et al. 2008 [3] | ACC/AHA 2004 GL on CABG                     | American registry                                                                                                      | - Coronary anatomy                                                                                                                                                                                                                                                 | Useful procedure = Recommendation class I                                                                                                                                                                                             | Proportion of useful, evidence favours procedure, evidence less well established and not useful procedures<br>+ adherent and non-adherent to guidelines | 87% useful (class I)<br>11% procedure favoured (class IIa)<br>2% not useful (class III)<br><br>Overall: 98% adherence |
|                          | CABG                                        | Data contribution by centres                                                                                           | - Extent of stenosis<br>- Extent of ischemia<br>- Symptom status<br>- Shock<br>- Prior treatment<br>- Suitability for surgery/PCI<br>- Hemodynamic stability<br>- Cardiac history (e.g. STEMI)<br>- Area of viable myocardium<br>- Results of non-invasive testing | Evidence favours procedure = Recommendation class IIa<br><br>Evidence less well established = Recommendation class IIb<br><br>Procedure not useful = Recommendation class III<br><br>Adherence = CABG if recommendation class I or II |                                                                                                                                                         |                                                                                                                       |
| Witberg et al. 2014 [4]  | ESC 2010 GL on myocardial revascularization | Chart review by study personnel                                                                                        | - Clinical, laboratory, angiographic characteristics                                                                                                                                                                                                               | Adherence = PCI/CABG according to indication                                                                                                                                                                                          | Proportion of adherent/non-adherent treatment                                                                                                           | PCI:<br>78% adherence                                                                                                 |
|                          | PCI, CABG                                   | Calculation of SS (and cSS) by a study physician not blinded to mode of revascularization using a web-based calculator | - SS/cSS                                                                                                                                                                                                                                                           | Indication for PCI = recommendation class IIa<br><br>No indication for PCI/Indication for CABG = recommendation class III for PCI                                                                                                     | A binary measure                                                                                                                                        | CABG:<br>49% adherence                                                                                                |

| Study                  | Guideline and treatment decision                    | Data source and collection                                                  | Data and variables                                                                                | Definition of guideline adherence                                                                           | Quantification and level of measurement                                                                    | Extent of guideline adherence                                                                                                               |                  |
|------------------------|-----------------------------------------------------|-----------------------------------------------------------------------------|---------------------------------------------------------------------------------------------------|-------------------------------------------------------------------------------------------------------------|------------------------------------------------------------------------------------------------------------|---------------------------------------------------------------------------------------------------------------------------------------------|------------------|
| Leape et al. 2003 [5]  | ACC/AHA 1988/1993 GL on PTCA                        | Medicare data + patient charts                                              | Clinical and laboratory data (e.g. symptoms, extent of CAD)                                       | Justified procedure = recommendation class I                                                                | Proportion of justified, uncertain, not indicated procedures (and adherent and non-adherent to guidelines) | PTCA, 1988 GL:<br>- 18% justified (class I),<br>- 55% uncertain (class II)<br>- 27% not indicated (class III)<br>- Overall: 73% adherence   |                  |
|                        | ACC/AHA 1991 GL on CABG                             | Review of coronary angiography report and charts by trained study personnel |                                                                                                   | Uncertain procedure = recommendation class II                                                               |                                                                                                            |                                                                                                                                             |                  |
|                        | PTCA, CABG                                          |                                                                             |                                                                                                   | No indication for procedure = recommendation class III                                                      |                                                                                                            |                                                                                                                                             |                  |
|                        |                                                     |                                                                             |                                                                                                   | Adherence= procedures rated as justified and uncertain                                                      |                                                                                                            |                                                                                                                                             |                  |
|                        |                                                     |                                                                             |                                                                                                   |                                                                                                             |                                                                                                            | PTCA, 1993 GL:<br>- 15% justified (class I),<br>- 58 % uncertain (class II)<br>- 27 % not indicated (class III)<br>- Overall: 73% adherence |                  |
|                        |                                                     |                                                                             |                                                                                                   |                                                                                                             |                                                                                                            | CABG:<br>- 86% justified (class I),<br>- 12% uncertain (class II)<br>- 2% not indicated (class III)<br>- Overall: 98% adherence             |                  |
| Linder et al. 2018 [6] | NVL 2013 on chronic CAD                             | Claims data                                                                 | - ICD-Code (diagnosis, number of lesioned vessels)<br><br>- EBM/OPS codes for stents implantation | Adherence = no PCI if indication for CABG                                                                   | Proportion of adherent/non-adherent treatment                                                              | 67% adherence                                                                                                                               |                  |
|                        | (ESC/EACTS 2014 GL on myocardial revascularization) | Data record review using ICD-/OPS-/EBM-Codes by study personnel             |                                                                                                   | Indication = recommendation grade A (/Class I recommendation for CABG and class III recommendation for PCI) |                                                                                                            |                                                                                                                                             |                  |
|                        | PCI                                                 |                                                                             |                                                                                                   |                                                                                                             |                                                                                                            |                                                                                                                                             | A binary measure |

| Study                    | Guideline and treatment decision                    | Data source and collection                                                                                                     | Data and variables                                       | Definition of guideline adherence                                                                                                      | Quantification and level of measurement       | Extent of guideline adherence              |
|--------------------------|-----------------------------------------------------|--------------------------------------------------------------------------------------------------------------------------------|----------------------------------------------------------|----------------------------------------------------------------------------------------------------------------------------------------|-----------------------------------------------|--------------------------------------------|
| Marino et al. 2020 [7]   | ESC/EACTS 2018 GL on myocardial revascularization   | Patient charts                                                                                                                 | - SS<br>- Coronary anatomy<br>- Significance of stenoses | a) Adherence = PCI if strong recommendation for PCI or similar recommendation for PCI/CABG                                             | Proportion of adherent/non-adherent treatment | a) PCI:<br>91% adherence                   |
|                          | (ACCF/AHA GL 2012 on stable ischemic heart disease) | Review of chart and coronary angiogram and determination of PTP by study personnel                                             |                                                          | Strong recommendation = Class I recommendation for PCI and class IIb for CABG                                                          | A binary measure                              | b) Ad hoc PCI:<br>17% adherence            |
|                          | PCI, Ad hoc PCI                                     | Definition of SS and SYNTAX Revascularization Index, coronary anatomy and presence of 'borderline' stenosis by study personnel |                                                          | Similar recommendation = Class I recommendation for PCI and class I for CABG, class IIa recommendation for PCI and class I/II for CABG |                                               |                                            |
|                          |                                                     |                                                                                                                                |                                                          | b) Non-adherence = ad hoc PCI if indication for heart team discussion                                                                  |                                               |                                            |
| Leonardi et al. 2017 [8] | ESC 2013 GL on stable CAD                           | Review of chart and coronary angiogram and determination of PTP by study personnel                                             | - Coronary anatomy<br>- Significance of stenoses<br>- SS | a) Adherence = heart team discussion if indication                                                                                     | Proportion of adherent/non-adherent treatment | a) Heart team discussion:<br>11% adherence |
|                          | ESC/EACTS 2014 GL on myocardial revascularization   | Definition of SS, coronary anatomy and presence of 'borderline' stenosis by study personnel                                    | - Evidence of heart team discussion                      | b) Non-adherence = ad hoc PCI if indication for heart team discussion                                                                  | A binary measure                              | b) Ad hoc PCI:<br>20% adherence            |
|                          | Ad hoc PCI, PCI with heart team discussion          |                                                                                                                                |                                                          | Indication = recommendation class I for heart team, recommendation class I for CABG                                                    |                                               |                                            |
|                          |                                                     |                                                                                                                                |                                                          |                                                                                                                                        |                                               |                                            |

| Study                          | Guideline and treatment decision                  | Data source and collection                                                                                                                                   | Data and variables                                                                                                                                                                                         | Definition of guideline adherence                                                                                      | Quantification and level of measurement                                               | Extent of guideline adherence |
|--------------------------------|---------------------------------------------------|--------------------------------------------------------------------------------------------------------------------------------------------------------------|------------------------------------------------------------------------------------------------------------------------------------------------------------------------------------------------------------|------------------------------------------------------------------------------------------------------------------------|---------------------------------------------------------------------------------------|-------------------------------|
| Yates et al. 2014 [9]          | ESC/EACTS 2010 GL on myocardial revascularization | British registry, records on heart team discussion                                                                                                           | <ul style="list-style-type: none"><li>- Coronary anatomy</li><li>- Significance of stenoses</li><li>- Diagnosis</li><li>- Management plan</li><li>- Reasons for deviation from expected practice</li></ul> | Adherence = heart team discussion before revascularization if indication                                               | Proportion of adherent/non-adherent treatment                                         | 2010: 10% adherence           |
|                                | PCI with heart team discussion                    | Prospective data collection during PCI in registry by care providers                                                                                         |                                                                                                                                                                                                            | Indication = recommendation class I                                                                                    | A binary measure                                                                      | 2011: 19% adherence           |
| Morgan-Hughes et al. 2021 [10] | NICE CG95 (2016)                                  | Review of database of all patients discussed by the heart team by study personnel, minutes recorded at each meeting                                          |                                                                                                                                                                                                            |                                                                                                                        |                                                                                       |                               |
|                                | CA                                                | Prospective data collection at participating centres in patient records and picture archiving/communication systems and anonymized collation at audit centre | <ul style="list-style-type: none"><li>- Demographic information</li><li>- CTCA results</li><li>- Diagnostic tests</li><li>- Revascularization</li></ul>                                                    | Non-adherence = Overuse of CA<br><br>Surrogate: Overuse of CA = CA without strong recommendation and revascularization | Proportion of adherent/non-adherent (overuse of CA) treatment<br><br>A binary measure | 52% adherence                 |
|                                |                                                   | Definition of CTCA as diagnostic or not by reporting cardiologist/radiologist using own criteria                                                             |                                                                                                                                                                                                            |                                                                                                                        |                                                                                       |                               |

| Study                    | Guideline and treatment decision | Data source and collection                                                                                                                                                         | Data and variables                                                                                                                                                                     | Definition of guideline adherence                                                                                                                                                                                                                                                                                                                                    | Quantification and level of measurement                                                                | Extent of guideline adherence                                                                                 |
|--------------------------|----------------------------------|------------------------------------------------------------------------------------------------------------------------------------------------------------------------------------|----------------------------------------------------------------------------------------------------------------------------------------------------------------------------------------|----------------------------------------------------------------------------------------------------------------------------------------------------------------------------------------------------------------------------------------------------------------------------------------------------------------------------------------------------------------------|--------------------------------------------------------------------------------------------------------|---------------------------------------------------------------------------------------------------------------|
| Leung et al. 2007 [11]   | ACC/AHA 1999 GL on CA            | N/A                                                                                                                                                                                | <ul style="list-style-type: none"><li>- Clinical history</li><li>- Coronary risk factors (e.g. diabetes mellitus, smoking)</li></ul>                                                   | Adherence = CA if recommendation class I or II                                                                                                                                                                                                                                                                                                                       | Proportion of adherent/non-adherent treatment                                                          | 53% adherence                                                                                                 |
|                          | CA                               | <p>Prospective data recording by study personnel</p> <p>Classification (visual) of chest pain and estimation of the degree of coronary stenosis by experienced study personnel</p> | <ul style="list-style-type: none"><li>- Symptoms</li><li>- Results of electrocardiograms and laboratory tests</li><li>- Extent of stenosis</li><li>- Prior treatment</li></ul>         | (Non-adherence = CA if recommendation class III or no recommendation class I or II)                                                                                                                                                                                                                                                                                  | A binary measure                                                                                       |                                                                                                               |
| Rubboli et al. 2001 [12] | ACC/AHA 1999 GL for CA           | Chart review by study personnel                                                                                                                                                    | <ul style="list-style-type: none"><li>- Clinical diagnosis (indication)</li><li>- Comorbidities</li></ul>                                                                              | Useful procedure = recommendation class I                                                                                                                                                                                                                                                                                                                            | Proportion of useful, evidence favours procedure, evidence less well established and not useful        | Approx. 71% useful<br>Approx. 8% favoured (class IIa)<br>21% less established (class IIb)                     |
|                          | CA                               | Charts filled out by catheterization cardiologist                                                                                                                                  | <ul style="list-style-type: none"><li>- Cardiovascular risk factors</li><li>- Laboratory test results</li><li>- Instrumental examination results</li><li>- Ongoing treatment</li></ul> | <p>Evidence favours procedure = recommendation class IIa</p> <p>Evidence less well established = recommendation class IIb</p> <p>Non-useful procedure = recommendation class III</p> <p>Adherence = CA if recommendation class I (useful) or IIa (evidence favours procedure)</p> <p>Uncertain = CA if recommendation class IIb (evidence less well established)</p> | <p>procedures + adherent, uncertain and non-adherent procedures</p> <p>A multi-categorical measure</p> | <p>Overall:<br/>79% adherent (class I /IIa)<br/>21% uncertain (class IIb)<br/>0% non-adherent (class III)</p> |

| Study | Guideline and treatment decision | Data source and collection | Data and variables | Definition of guideline adherence                           | Quantification and level of measurement | Extent of guideline adherence |
|-------|----------------------------------|----------------------------|--------------------|-------------------------------------------------------------|-----------------------------------------|-------------------------------|
|       |                                  |                            |                    | Non-adherence = CA if recommendation class III (not useful) |                                         |                               |

ACC = American College of Cardiology, ACCF = American College of Cardiology Foundation, AHA = American Heart Association, CA = Coronary Angiography, CABG = Coronary Artery Bypass Grafting, CAD = Coronary Artery Disease, cSS = clinical Syntax Score, CTCA = Computed Tomography – CA, DM = Diabetes mellitus, EBM = Common Assessment Scale, ESC = European Society of Cardiology, EACTS = European Association for Cardio-Thoracic Surgery, GL = Guideline, ICD = International Classification of Diseases, (LV)EF = (Left Ventricular) Ejection Fraction, LVF = Left Ventricular Function, (N)STEMI = (non-)ST-segment Elevation Myocardial Infarction, NVL = National disease management guideline, OPS = Operation and procedure codes, PCI = Percutaneous Coronary Intervention, PTCA = Percutaneous Transluminal Coronary Angioplasty, PTP = Pre-Test Probability, SS = Syntax Score

## References

1. Kiselev AR, Korotin AS, Posnenkova OM, et al. Discrepancy between the European clinical guidelines and myocardial revascularization in patients with stable coronary artery disease in Russia. *Int J Qual Health Care* 2019 May 1;31(4):269-75. doi: 10.1093/intqhc/mzy140
2. Epstein AM, Weissman JS, Schneider EC, et al. Race and gender disparities in rates of cardiac revascularization: do they reflect appropriate use of procedures or problems in quality of care? *Med Care* 2003 Nov;41(11):1240-55. doi: 10.1097/01.mlr.0000093423.38746.8c
3. O'Connor GT, Olmstead EM, Nugent WC, et al. Appropriateness of Coronary Artery Bypass Graft Surgery Performed in Northern New England. *J Am Coll Cardiol* 2008;51(24):2323-8. doi: 10.1016/j.jacc.2008.01.067
4. Witberg G, Lavi I, Gonen O, et al. Long-term outcomes of patients with complex coronary artery disease according to agreement between the SYNTAX score and revascularization procedure in contemporary practice. *Coron Artery Dis* 2014 Jun;25(4):296-303. doi: 10.1097/mca.0000000000000106
5. Leape LL, Weissman JS, Schneider EC, et al. Adherence to practice guidelines: The role of specialty society guidelines. *Am Heart J* 2003;145(1):19-26. doi: 10.1067/mhj.2003.35
6. Linder R, Zeidler J, Verheyen F, et al. Guidelines versus reality: is coronary stent application in three-vessel disease standard or the exception? *Eur J Health Econ* 2018 Jul;19(6):821-30. doi: 10.1007/s10198-017-0924-4
7. Marino M, Leonardi S, Crimi G, et al. Lack of implementation of guidelines recommendations for coronary revascularization in stable patients with complex disease is associated with high rates of incomplete revascularization: Analysis from the Apache study. *Heart Vessels* 2020 Jan;35(1):30-7. doi: 10.1007/s00380-019-01459-1
8. Leonardi S, Marino M, Crimi G, et al. APpropriAteness of percutaneous Coronary interventions in patients with ischaemic HEart disease in Italy: the APACHE pilot study. *BMJ Open* 2017 Sep 5;7(9):e016909. doi: 10.1136/bmjopen-2017-016909



9. Yates MT, Soppa GK, Valencia O, et al. Impact of European Society of Cardiology and European Association for Cardiothoracic Surgery Guidelines on Myocardial Revascularization on the activity of percutaneous coronary intervention and coronary artery bypass graft surgery for stable coronary artery disease. *J Thorac Cardiovasc Surg* 2014 Feb;147(2):606-10. doi: 10.1016/j.jtcvs.2013.01.026
10. Leung DY, Hallani H, Lo ST, et al. How compliant are we with guidelines for coronary angiography in clinical practice? *Intern Med J* 2007;37(10):699-704. doi: 10.1111/j.1445-5994.2007.01390.x
11. Morgan-Hughes G, Williams MC, Loudon M, et al. Downstream testing after CT coronary angiography: time for a rethink? *Open heart* 2021 Feb;8(1). doi: 10.1136/openhrt-2021-001597
12. Rubboli A, La Vecchia L, Casella G, et al. Appropriateness of the use of coronary angiography in a population of patients with ischemic heart disease. *Ital Heart J* 2001 Sep;2(9):696-701.
